# Supplementary material for: Characterization of Fatty Acids, Polysaccharides, Amino Acids, and Minerals in Marine Macroalga Chaetomorpha crassa and Evaluation of Their Potentials in Skin Cosmetics
Source: MDPI journal article supplement (doi:10.3390/molecules26247515), 2021-12-11
Supplement: s1 [file s1]

**Table S1.** Chemical structures obtained in Methanolic extract of *C. crassa*.

| No. | Name of the Chemical Compound              | Structures                                                                          | Kovats Index (iu) in Present Study | Active Phase              | Kovats Index Value from the Previous Study | Reference |
|-----|--------------------------------------------|-------------------------------------------------------------------------------------|------------------------------------|---------------------------|--------------------------------------------|-----------|
| 1.  | Tritriacontane, 13-decyl-13-heptyl-        | 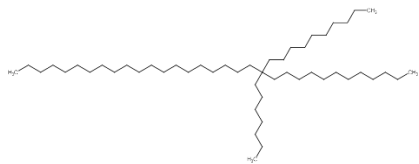   | 4907                               | DB-5MS                    | 500.99                                     | [1]       |
| 2.  | Hexadecane                                 |    | 1612                               | DB-5MS                    | 268.29                                     | [2]       |
|     |                                            |                                                                                     |                                    | DB-5MS                    | 272.02                                     | [2]       |
| 3.  | Hydroperoxide, 1-methylhexyl               |    | 1013                               | -                         | -                                          | -         |
| 4.  | Oxalic acid, isobutyl nonyl ester          |   | 1783                               | -                         | -                                          | -         |
| 5.  | Dodecanoic acid, 1,2,3-propanetriyl ester  |  | 4336                               | -                         | -                                          | -         |
| 6.  | Phthalic acid, 6-ethyl-3-octyl butyl ester |  | 2505                               | 5% Phenyl methyl siloxane | 2209                                       | [3]       |

(iu: index unit).

**Table S2.** Details of Phytochemicals identified through GC-MS Analysis of Methanolic Extract.

| No. | Name of the Chemical Compound | Structures                                                                          | Kovats Index (iu) in Present Study | Active Phase | Kovats Index Value from the Previous Study | Reference |
|-----|-------------------------------|-------------------------------------------------------------------------------------|------------------------------------|--------------|--------------------------------------------|-----------|
| 1.  | n-Hexadecanoic acid           | 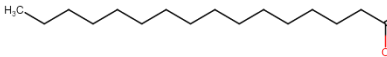 | 1968                               | BP-1         | 1961.                                      | [4]       |
|     |                               |                                                                                     |                                    | HP-5MS       | 1964                                       | [5]       |
|     |                               |                                                                                     |                                    | DB-5         | 1972                                       | [6]       |
|     |                               |                                                                                     |                                    | SE-30        | 1940                                       | [7]       |
|     |                               |                                                                                     |                                    | HP-5         | 1970                                       | [8]       |
|     |                               |                                                                                     |                                    | RTX-1        | 1942                                       | [9]       |
| 2.  |                               |                                                                                     | 1702                               | HP-5 MS      | 1708                                       | [10]      |

|     |                                                                                       |                                                                                          |                                                                  |                              |                              |
|-----|---------------------------------------------------------------------------------------|------------------------------------------------------------------------------------------|------------------------------------------------------------------|------------------------------|------------------------------|
|     | Oxirane,<br>tetradecyl-                                                               | 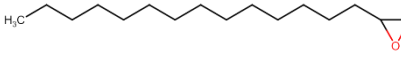        | TR-5 MS                                                          | 1676                         | [11]                         |
| 3.  | Oleic<br>Acid                                                                         |  2140   | HP-5<br>HP-5MS<br><a href="#">DB-5</a><br><a href="#">DB-Wax</a> | 2144<br>2141<br>2161<br>3184 | [12]<br>[13]<br>[14]<br>[15] |
| 4.  | 9,12-<br>Octadecadi<br>enoic acid<br>[Z]-,<br>phenylmeth<br>yl ester                  |  2766   | HP-5MS                                                           | 2764.5                       | [16]                         |
| 5.  | 5-<br>Methyl-Z-5-<br>docosene                                                         |  2292   | -                                                                | -                            | -                            |
| 6.  | Ergost-<br>5-en-3-ol,<br>acetate,<br>[3β,24R]-                                        |  2771   | OV-1<br>OV-1                                                     | 3323<br>3278                 | [17]<br>[17]                 |
| 7.  | Stigma<br>stan-6,22-<br>dien, 3,5-<br>dedihydro-                                      |  2437  | -                                                                | -                            | -                            |
| 8.  | 6,9,12-<br>Octadecatri<br>enoic acid,<br>phenylmeth<br>yl ester,<br>[Z,Z,Z]-          |  2774 | HP-5                                                             | 2702                         | [18]                         |
| 9.  | Trideca<br>nedial                                                                     |  1690 | HP-5                                                             | 2229                         | [19]                         |
| 10. | 9,10-<br>Secocholest<br>a-5,7,10[19]-<br>triene-<br>3,24,25-<br>triol,<br>[3β,5Z,7E]- |  3124 | -                                                                | -                            | -                            |
| 11. | Stigma<br>stan-3,5-<br>diene                                                          |  2525 | OV-101                                                           | 3040                         | [20]                         |
| 12. | 6-<br>Octadeceno<br>ic acid,<br>methyl<br>ester, [Z]-                                 |  2085 | VF-5MS                                                           | 2104.5                       | [21]                         |
| 13. | 9-<br>Octadeceno<br>ic acid [Z]-,                                                     | 2758                                                                                     | OV-101<br>CP Sil 5 CB<br>DB-1                                    | 2074.7<br>2072<br>2085       | [22]<br>[23]<br>[24]         |

|     |                                         |                                                                                   |       |      |      |
|-----|-----------------------------------------|-----------------------------------------------------------------------------------|-------|------|------|
|     | phenylmeth<br>yl ester                  | 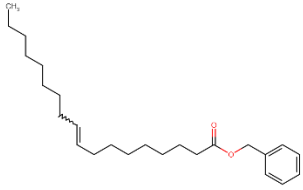 | SE-30 | 2081 | [25] |
|     |                                         |                                                                                   | DB-5  | 2085 | [26] |
| 14. | Z-8-Methyl-9-tetradecenoic acid         |  | 1813  | -    | -    |
| 15. | E-11-Tetradecenol, trimethylsilyl ether |  | 1705  | -    | -    |

(iu: index unit).

**Table S3.** Chemical structures of carbohydrate derivatives obtained by HRLCMS-QTOF in *C. crassa*.

|                                                                                     |                                                                                     |                                                                                      |                                                                                      |
|-------------------------------------------------------------------------------------|-------------------------------------------------------------------------------------|--------------------------------------------------------------------------------------|--------------------------------------------------------------------------------------|
| 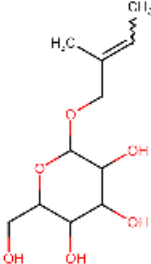  |   |   |  |
| 10753054                                                                            | 198272                                                                              | 16069998                                                                             | 156269                                                                               |
|  |  |  |                                                                                      |
| 102331585                                                                           | 23622616                                                                            | 54676871                                                                             |                                                                                      |

(Each obtained chemical structure labeled with its PubChem ID; PubChem ID tabulated in Table 6).

**Table S4.** Chemical structures obtained by HRLCMS-QTOF in *C. crassa*.

|                                                                                     |                                                                                     |                                                                                      |                                                                                       |
|-------------------------------------------------------------------------------------|-------------------------------------------------------------------------------------|--------------------------------------------------------------------------------------|---------------------------------------------------------------------------------------|
| 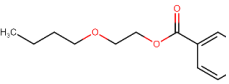 |  |  |  |
| 14866                                                                               | 107982                                                                              | 122121                                                                               | 5312303                                                                               |

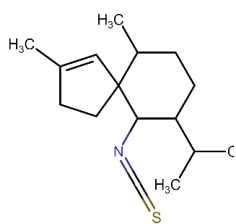

23425033

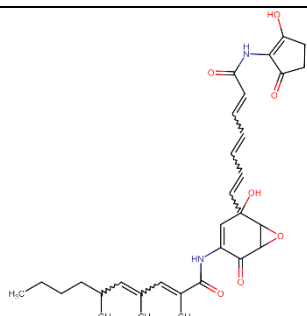

6438330

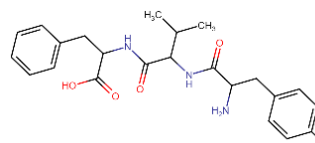

139658609

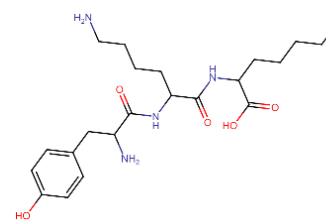

145458707

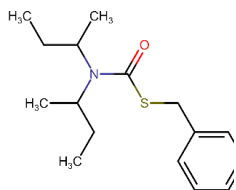

37523

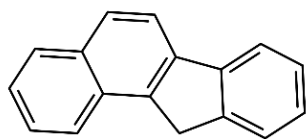

9195

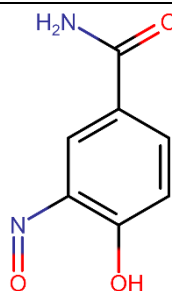

443631

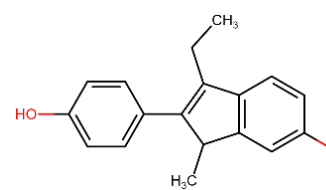

146460

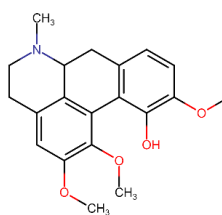

10143

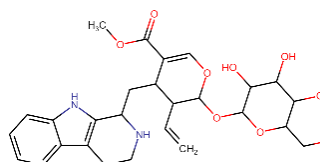

161336

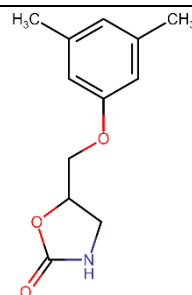

15459

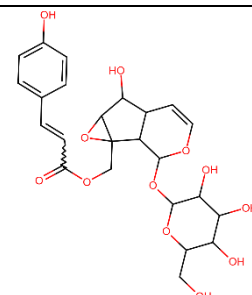

6443034

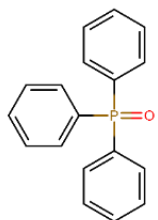

13097

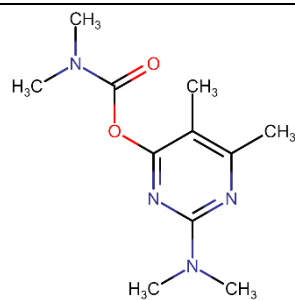

31645

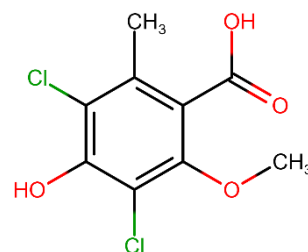

21724963

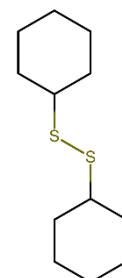

17356

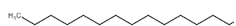

16217

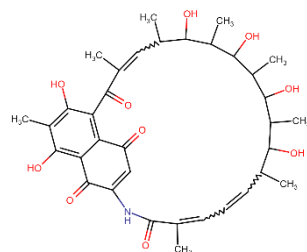

11017668

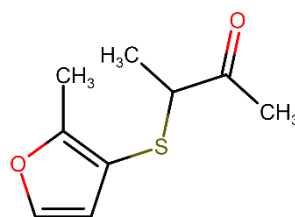

12980878

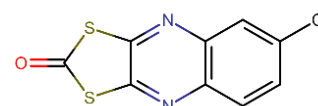

17109

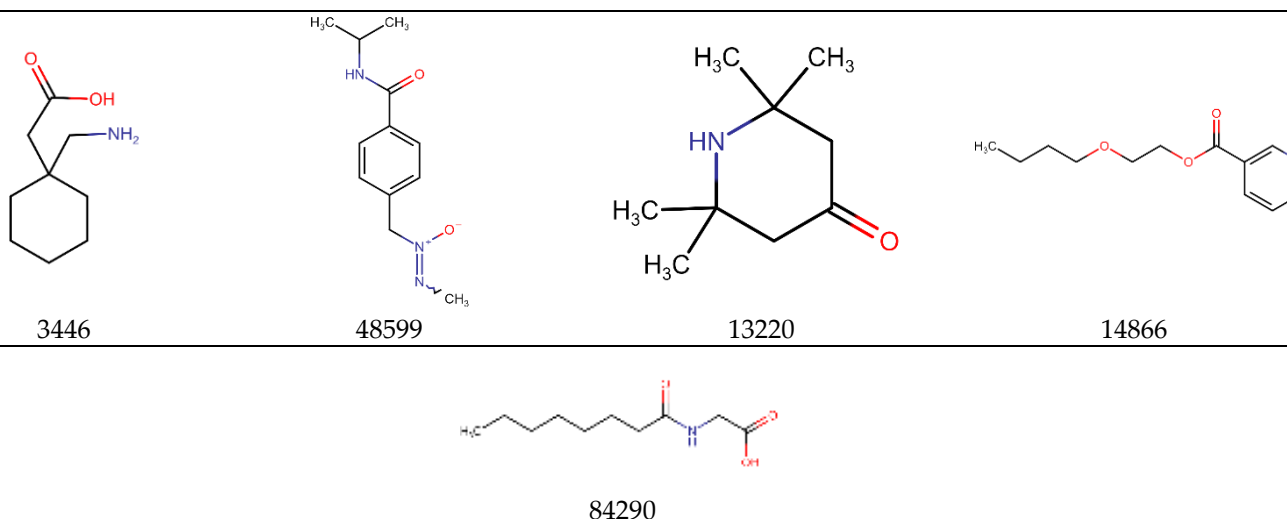

(Each obtained chemical structure labeled with its PubChem ID; PubChem ID tabulated in Table 7).

## Reference

- Chen, P.H.; Keeran, W.S.; Van Ausdale, W.A.; Schindler, D.R.; Roberts, D.W. Application of Lee retention indices to the confirmation of tentatively identified compounds from GC/MS analysis of environmental samples. In Proceedings of the Ninth Annual Waste Testing and Quality Assurance Symposium, Washington, DC, USA, July 12-16, **1993**.
- Chen, P.H.; Keeran, W.S.; Van-Ausdale, W.A.; Schindler, D.R.; Roberts, D.W. *Technical paper, Analytical Services Division; Environmental Science and Engineering, Inc., PO Box 1703, Gainesville, FL 32602, 11(2002)*.
- Zaikin, V.G. Chromatography-mass spectrometry. *J. Anal. Chem.* **2011**, *66*, 1090–1094.
- Raina, V.K.; Verma, S.C.; Dhawan, S.; Khan, M.; Ramesh, S.; Singh, S.C.; Yadav, A.; Srivastava, S.K. Essential oil composition of *Murraya exotica* from the plains of northern India. *Flavour Fragr. J.* **2006**, *21*, 140–142. <https://doi.org/10.1002/ffj.1547>.
- Asuming, W.A.; Beauchamp, P.S.; Descalzo, J.T.; Dev, B.C.; Dev, V.; Frost, S.; Ma, C.W. Essential oil composition of four *Lomatium Raf.* species and their chemotaxonomy. *Biochem. Syst. Ecol.* **2005**, *33*, 17–26. <https://doi.org/10.1016/j.bse.2004.06.005>.
- Morteza-Semnani, K.; Azadbakht, M.; Goodarzi, A. The essential oils composition of *Phlomis herba-venti* L. leaves and flowers of Iranian origin. *Flavour Fragr. J.* **2004**, *19*, 29–31.
- Jantan, I.; Ahmad, A.S.; Ahmad, A.R.; Ali, N.A.M.; Ayop, N. Chemical Composition of Some Citrus Oils from Malaysia. *J. Essent. Oil Res.* **1996**, *8*, 627–632. <https://doi.org/10.1080/10412905.1996.9701030>.
- Stojanovic, G.; Palic, R.; Alagic, S.; Zeković, Z. Chemical composition and antimicrobial activity of the essential oil and CO<sub>2</sub> extracts of semi-oriental tobacco, *Otlja*. *Flavour Fragr. J.* **2000**, *15*, 335–338. [https://doi.org/10.1002/1099-1026\(200009/10\)15:53.3.co;2-n](https://doi.org/10.1002/1099-1026(200009/10)15:53.3.co;2-n).
- Paolini, J.; Muselli, A.; Bernardini, A.-F.; Bighelli, A.; Casanova, J.; Costa, J. Thymol derivatives from essential oil of *Doronicum corsicum* L. *Flavour Fragr. J.* **2007**, *22*, 479–487. <https://doi.org/10.1002/ffj.1824>.
- Xu, L.-L.; Han, T.; Wu, J.-Z.; Zhang, Q.-Y.; Zhang, H.; Huang, B.-K.; Rahman, K.; Qin, L.-P. Comparative research of chemical constituents, antifungal and antitumor properties of ether extracts of *Panax ginseng* and its endophytic fungus. *Phytomedicine* **2009**, *16*, 609–616. <https://doi.org/10.1016/j.phymed.2009.03.014>.
- Kurashov, E.A.; Mitrukova, G.G.; Krylova, Y.V. Dynamics of essential oil composition in *Ceratophyllum demersum* (Ceratophyllaceae) during vegetation. *Rastit. Resur.* **2014**, *50*, 132–144.
- Leffingwell, J.C.; Alford, E.D. Volatile constituents of perique tobacco. *Electron. J. Environ. Agric. Food Chem.* **2005**, *4*, 899–915.
- Pino, J.A.; Mesa, J.; Muñoz, Y.; Martí, M.P.; Marbot, R. Volatile Components from Mango (*Mangifera indica* L.) Cultivars. *J. Agric. Food Chem.* **2005**, *53*, 2213–2223. <https://doi.org/10.1021/jf0402633>.
- A Priestap, H.; van Baren, C.M.; Lira, P.D.L.; Coussio, J.; Bandoni, A.L. Volatile constituents of *Aristolochia argentina*. *Phytochemistry* **2003**, *63*, 221–225. [https://doi.org/10.1016/s0031-9422\(02\)00751-3](https://doi.org/10.1016/s0031-9422(02)00751-3).
- Chung, T.Y.; Eiserich, J.P.; Shibamoto, T. Volatile compounds produced from peanut oil heated with different amounts of cysteine. *J. Agric. Food Chem.* **1994**, *42*, 1743–1746. <https://doi.org/10.1021/jf00044a032>.
- Andriamaharavo, N.R. 2014, Retention data. NIST Mass Spectrometry Data Center. Available online: <https://webbook.nist.gov/cgi/inchi?ID=C60045274&Mask=2000> (accessed on November 16, 2021).
- Itoh, T.; Tani, H.; Fukushima, K.; Tamura, T.; Matsumoto, T. Structure-retention relationship of sterols and triterpene alcohols in gas chromatography on a glass capillary column. *J. Chromatogr. A* **1982**, *234*, 65–76. [https://doi.org/10.1016/s0021-9673\(00\)81781-1](https://doi.org/10.1016/s0021-9673(00)81781-1).

18. Zhao, Y.-P.; Wang, X.-Y.; Wang, Z.-C.; Lu, Y.; Fu, C.-X.; Chen, S.-Y. Essential oil of *Actinidia macrosperma*, a catnip response kiwi endemic to China. *J. Zhejiang Univ. Sci. B* **2006**, *7*, 708–712. <https://doi.org/10.1631/jzus.2006.b0708>.
19. Zeng, Q.Y.; Wu, J.; Lin, P.C. Chemical Composition and Antimicrobial Activity of the Essential Oil from *Epilobium angustifolium*. *Chem. Nat. Compd.* **2016**, *52*, 1113–1115. <https://doi.org/10.1007/s10600-016-1878-y>.
20. Velisek, J.; Davidek, J.; Kubelka, V. Formation of DELTA.3,5-diene and 3-chloro DELTA.5-ene analogs of sterols in protein hydrolysates. *J. Agric. Food Chem.* **1986**, *34*, 660–662. <https://doi.org/10.1021/jf00070a017>.
21. Tret'yakov, K.V. Retention Data NIST Mass Spectrometry Data Center. 2007. Available online: <http://webbook.nist.gov/cgiilcbook.cgi> (accessed on November 18, 2021).
22. Kittiratanapiboon, K.; Jeyashoke, N.; Krisnangkura, K. The Relationship of Kováts Retention Indices and Equivalent Chain Lengths of Fatty Acid Methyl Esters on a Methyl Silicone Capillary Column. *J. Chromatogr. Sci.* **1998**, *36*, 361–364.
23. Hanai, T.; Hong, C. Structure-retention correlation in CGC. *J. High Resolut. Chromatogr.* **1989**, *12*, 327–332. <https://doi.org/10.1002/jhrc.1240120517>.
24. Golovnya, R.V.; Kuzmenko, T.E. Thermodynamic evaluation of the interaction of fatty acid methyl esters with polar and non-polar stationary phases, based on their retention indices. *Chromatographia* **1977**, *10*, 545–548. <https://doi.org/10.1007/bf02262915>.
25. Golovnya, R.; Uralets, V.; Kuzmenko, T. Characterization of fatty acid methyl esters by gas chromatography on siloxane liquid phases. *J. Chromatogr. A* **1976**, *121*, 118–121. [https://doi.org/10.1016/s0021-9673\(00\)82312-2](https://doi.org/10.1016/s0021-9673(00)82312-2).
26. Wu, S.; Zorn, H.; Krings, U.; Berger, R.G. Volatiles from submerged and surface-cultured beefsteak fungus, *Fistulina hepatica*. *Flavour Fragr. J.* **2007**, *22*, 53–60. <https://doi.org/10.1002/ffj.1758>.
